# Supplementary material for: Bridging Pediatric and Adult Rehabilitation Services for Young Adults With Childhood-Onset Disabilities: Evaluation of the LIFEspan Model of Transitional Care
Source: Frontiers journal article supplement (doi:10.3389/fped.2021.728640), 2021-09-17
Supplement: Table_1.docx [file Table_1.docx]

**Table 1**. Clinical and demographic characteristics of (prospective) participants at study enrolment (16 years of age).

|  | **ABI**  **N (%)** | **CP**  **N (%)** | **SB**  **N (%)** |
| --- | --- | --- | --- |
| **Sex** |  |  |  |
| Male | 19 (63) | 30 (62) | 10 (48) |
| Female | 11 (37) | 18 (38) | 11 (52) |
|  |  |  |  |
| **Diagnostic details** | Injury: 20 (67) | GMCFS I: 12 (25) | Lipomyelomingocele: 17 (81) |
|  | Medical: 10 (33) | GMCFS II: 5 (10) | Myelomeningocele: 2 (9.5) |
|  |  | GMCFS III: 8 (17) | Not reported: 2 (9.5) |
|  |  | GMCFS IV: 4 (8) |  |
|  |  | GMCFS V: 10 (21) |  |
|  |  | Other/Not reported: 9 (19) |  |
|  |  |  |  |
|  |  |  |  |
| **Canadian born*** | 17 (81) | 32 (88) | 14 (93) |
|  |  |  |  |
| **Ethnicity*** |  |  |  |
| Caucasian | 11 (52) | 17 (47) | 8 (53) |
| Black | 6 (29) | 7 (19) | 2 (13) |
| Asian | 2 (9) | 6 (17) | 4 (27) |
| Other | 1 (5) | 2 (6) | 1 (7) |
| Prefer not to answer | 1 (5) | 4 (11) | 0 (0) |
|  |  |  |  |
| **Global Health Rating*** | Median: 4  Min: 1  Max: 5 | Median: 4  Min: 2  Max: 5 | Median: 3  Min: 2  Max: 5 |

*Data not provided for 9 ABI, 12 CP and 6 SBI
