# Supplementary material for: Bridging Pediatric and Adult Rehabilitation Services for Young Adults With Childhood-Onset Disabilities: Evaluation of the LIFEspan Model of Transitional Care
Source: Frontiers journal article supplement (doi:10.3389/fped.2021.728640), 2021-09-17
Supplement: Table_2.docx [file Table_2.docx]

**Table 2.** Secondary Outcomes: Physician Office Visits, Emergency Department (ED) Visits, and Hospitalizations by study groups.

|  | Pre* Events | Rate/person-year | Post^ Events | Rate/person-year | Rate Ratio# (post- versus pre-) | 95% CI |
| --- | --- | --- | --- | --- | --- | --- |
| **Office Visits** |  |  |  |  |  |  |
| LIFEspan | 716 | 4.90 | 340 | 4.66 | 0.95 | 0.77-1.17 |
| SB | 261 | 6.87 | 148 | 7.79 | 1.13 | 0.86-1.50 |
| Historical | 503 | 7.62 | 197 | 5.97 | 0.78 | 0.59-1.04 |
|  |  |  |  |  |  |  |
| **ED Visits** |  |  |  |  |  |  |
| Lifespan | 39 | 0.27 | 31 | 0.42 | 1.59 | 0.98-2.58 |
| SB | 30 | 0.79 | 12 | 0.63 | 0.80 | 0.41-1.54 |
| Historical | 25 | 0.38 | 10 | 0.30 | 0.80 | 0.36-1.76 |
|  |  |  |  |  |  |  |
| **Hospitalization** |  |  |  |  |  |  |
| LIFEspan | 10 | 0.07 | 3 | 0.04 | 0.60 | 0.17-2.16 |
| SB | 13 | 0.34 | 1 | 0.05 | 0.15 | 0.02-1.38 |
| Historical | 8 | 0.12 | 0 | 0 | N/A |  |

* two years prior to discharge

^ one year post-discharge

# Repeated Measures GEE Poisson Regression Analysis
